# Supplementary material for: Mutations in HECW2 are associated with intellectual disability and epilepsy
Source: PubMed Central journal article supplement — J Med Genet. 2016 Jun 22;53(10):697–704. doi: 10.1136/jmedgenet-2016-103814 (PMC5099177; doi:10.1136/jmedgenet-2016-103814), 2016-06-22
Supplement: jmedgenet-2016-103814supp_table1.pdf [file jmedgenet-2016-103814supp_table1.pdf]

Supplementary table 1: A list of each family in the study showing phenotypes, mutations identified and pathogenicity of each mutation. Key to abbreviations: DD=developmental delay, ID=intellectual disability, GUS=gene of uncertain significance, VOUS=variant of uncertain significance, M=male, F=female.

| Family | Gender | Phenotypes                                                                                                                                                                                                                                                                                                                                                                                                             | Genes with DNM                 | Mutation pathogenicity                                                      |
|--------|--------|------------------------------------------------------------------------------------------------------------------------------------------------------------------------------------------------------------------------------------------------------------------------------------------------------------------------------------------------------------------------------------------------------------------------|--------------------------------|-----------------------------------------------------------------------------|
| Fam1   | M      | Severe DD, absent speech, generalized epilepsy, encephalopathy, hypotonia, dystonia/dyskinesia, macrocephaly, cerebral atrophy, white matter abnormalities, ventriculomegaly                                                                                                                                                                                                                                           | <i>ADSL</i> * (recessive)      | ADSL: Pathogenic                                                            |
| Fam2   | F      | Severe ID, epilepsy, hypotonia, psychomotor delay, absent speech, unilateral dysplasia of external ear, unilateral external auditory canal atresia, unilateral deafness, high forehead, strabismus, flat nose, small feet                                                                                                                                                                                              | <i>CDKL5</i>                   | Pathogenic                                                                  |
| Fam3   | M      | Global DD, infantile spasms, hypersarrhythmia, bilateral multifocal epileptiform discharges, generalized tonic-clinic seizures, absent speech, hypotonia, inability to walk, hyperopia, astigmatism, thin corpus callosum, diffuse white matter abnormalities                                                                                                                                                          | <i>KCNQ2</i>                   | Pathogenic                                                                  |
| Fam4   | M      | Severe ID, autism, atypical absence seizures, atonic seizures, myoclonic absences, generalized tonic clonic seizures, no speech, ataxic gait, almond shaped eyes, full lips, narrow palate                                                                                                                                                                                                                             | <i>SYNGAP1</i>                 | Pathogenic                                                                  |
| Fam5   | M      | Mild DD, myoclonic seizures, fever induced seizures, slightly delayed motor development, delayed speech, flat face, congenital nystagmus, strabismus, hypertelorism, long philtrum, bilateral retentio testis, long second toe                                                                                                                                                                                         | <i>SETD5, ERC2, TMOD2</i>      | SETD5: Pathogenic                                                           |
| Fam6   | F      | Psychomotor DD, generalized epilepsy, delayed speech development, encephalopathy                                                                                                                                                                                                                                                                                                                                       | <i>KIAA1244, SMC1A, TBC1D4</i> | SMC1A: Pathogenic                                                           |
| Fam7   | F      | Moderate ID, autism, atypical absence seizures that developed to atonic seizures and eventually generalized tonic clonic seizures, microcephaly, thin corpus callosum, feeding difficulties since infancy, growth retardation, low hairline, synophrys, hypertelorism, bulbous nose tip, micrognathia, small ears, fifth toe clinodactyly, tapered feet and toes, supratentorial wide ventricles, thin corpus callosum | <i>EFTUD2, ZMYND11</i>         | EFTUD2: Likely pathogenic, ZMYND11: Pathogenic                              |
| Fam8   | F      | Mild ID, initially fever induced epilepsy, generalized tonic clonic seizures, hyperactivity, only speaks a few words, microcephaly, valgus feet, hypertelorism, asymmetric facial features, large maxilla, strabismus                                                                                                                                                                                                  | <i>GABRG2, AAAS</i>            | GABRG2: Likely pathogenic, AAAS: Variant of unknown clinical significance** |
| Fam9   | M      | Mild ID, drug resistant epilepsy, mild left sided hemiparesis                                                                                                                                                                                                                                                                                                                                                          | <i>GRIN1</i>                   | Likely pathogenic                                                           |
| Fam10  | M      | Mild ID, autism, epilepsy, delayed speech development                                                                                                                                                                                                                                                                                                                                                                  | <i>SCN2A</i>                   | Likely pathogenic                                                           |

|       |   |                                                                                                                                                                                                                                                                                                                           |                 |                   |
|-------|---|---------------------------------------------------------------------------------------------------------------------------------------------------------------------------------------------------------------------------------------------------------------------------------------------------------------------------|-----------------|-------------------|
|       |   | Mild ID, delayed speech development, focal seizures, mild fever induced epilepsy, cold induced asthma, mild hypotonia, deep set eyes, abnormal shape of palpebral fissures, broad nasal bridge, broad nasal ridge, retracted columella, thin upper lip vermillion, broad chin, widely spaced nipples, teratoma in infancy | <i>ST5</i>      | Likely pathogenic |
| Fam11 | F |                                                                                                                                                                                                                                                                                                                           |                 |                   |
| Fam12 | M | ID, epilepsy, ataxia                                                                                                                                                                                                                                                                                                      | <i>KCNA1</i>    | VOUS              |
|       |   | ID, autism, absence seizures, hyperactivity, neuronal migration disorder, dysmorphic features, hypotonia, cardiomyopathy                                                                                                                                                                                                  | <i>SLCO2A1</i>  | VOUS              |
| Fam13 | M |                                                                                                                                                                                                                                                                                                                           |                 |                   |
| Fam14 | F | ID, epilepsy, pain sensitivity, Arnold-Chiari malformation, bulging forehead, low set ears, strabismus, curly hair, macrocephaly, scoliosis, short stature                                                                                                                                                                | <i>CERS1</i>    | VOUS**            |
| Fam15 | F | ID, severe epilepsy                                                                                                                                                                                                                                                                                                       | <i>CHRDL1</i>   | VOUS**            |
|       |   | Autism, DD, generalized epilepsy, hyperactive, albinism, valgus feet deformity                                                                                                                                                                                                                                            | <i>MED12</i>    | VOUS**            |
| Fam16 | F |                                                                                                                                                                                                                                                                                                                           |                 |                   |
| Fam17 | M | ID, epilepsy, cryptorchidism                                                                                                                                                                                                                                                                                              | <i>A4GALT</i>   | GUS               |
| Fam18 | M | ID, epilepsy                                                                                                                                                                                                                                                                                                              | <i>AGTR1</i>    | GUS               |
|       |   | Severe ID, autism, primary generalized epilepsy, ataxic gait, hypermobility, hypotonia, hypoplastic distal phalanges of fingers and toes, cumbered nail beds, short broad thumbs, widely spaced nipples, cryptorchidism, narrow and high-arched palate, small and triangular mouth                                        | <i>BAZ1A</i>    | GUS               |
| Fam19 | M |                                                                                                                                                                                                                                                                                                                           |                 |                   |
| Fam20 | M | ID, epilepsy                                                                                                                                                                                                                                                                                                              | <i>C1orf116</i> | GUS               |
|       |   | Severe DD, absent speech, generalized epilepsy, encephalopathy, hypotonia, dystonia/dyskinesia, macrocephaly, cerebral atrophy, white matter abnormalities, ventriculomegaly                                                                                                                                              | <i>HECW2</i>    | GUS               |
| Fam21 | M |                                                                                                                                                                                                                                                                                                                           |                 |                   |
| Fam22 | M | ID, generalized epilepsy, myoclonia                                                                                                                                                                                                                                                                                       | <i>PAN2</i>     | GUS               |
|       |   | Severe epilepsy, status epilepticus, absent speech, hypertelorism, small and short nose, bulbous nose tip                                                                                                                                                                                                                 | <i>POLN</i>     | GUS               |
| Fam23 | F |                                                                                                                                                                                                                                                                                                                           |                 |                   |

\* Inherited pathogenic mutation \*\* Inheritance model does n  
GUS=gene of uncertain significance, VOUS=variant of unce
