# Supplementary material for: Mutations in HECW2 are associated with intellectual disability and epilepsy
Source: PubMed Central journal article supplement — J Med Genet. 2016 Jun 22;53(10):697–704. doi: 10.1136/jmedgenet-2016-103814 (PMC5099177; doi:10.1136/jmedgenet-2016-103814), 2016-06-22
Supplement: jmedgenet-2016-103814supp_table2.pdf [file jmedgenet-2016-103814supp_table2.pdf]

Supplementary table 2: A list of all DNMs with calculated CADD, GERP, SIFT, Polyphen2 scores, MutationTaster predictions and allele frequencies from the Exome Sequencing Project (ESP) and 1000 genome project. For MutationTaster predictions, A=Disease causing automatic, D=Disease causing, N=Polymorphism, 0=No prediction. The last column shows the Pubmed ID associated to sequencing projects where the exact same mutation has previously been found.

| Chr   | Start     | Stop      | Cons | Ref | Gene     | Family | Type          | CADD  | GERP  | SIFT | MutationTaster<br>Pred | Polyphen2 | ESP6500  |
|-------|-----------|-----------|------|-----|----------|--------|---------------|-------|-------|------|------------------------|-----------|----------|
| chr3  | 9490126   | 9490126   | G    | T   | SETD5    | Fam5   | Stopgain      | 46    | 5,76  | 0,01 | A                      | 0         | 0        |
| chrX  | 53423489  | 53423489  | G    | A   | SMC1A    | Fam6   | Stopgain      | 43    | 4,98  | 0,09 | D                      | 0         | 0        |
| chrX  | 18598085  | 18598085  | C    | T   | CDKL5    | Fam2   | Stopgain      | 38    | -0,78 | 1    | A                      | 0         | 0        |
| chr5  | 161576159 | 161576159 | G    | A   | GABRG2   | Fam8   | Nonsynonymous | 36    | 5,88  | 0    | D                      | 1         | 0        |
| chr12 | 53702981  | 53702981  | C    | T   | AAAS     | Fam8   | Nonsynonymous | 35    | 5,34  | 0,1  | D                      | 0,998     | 0,000077 |
| chr3  | 56330352  | 56330352  | C    | T   | ERC2     | Fam5   | Nonsynonymous | 32    | 5,86  | 0,02 | D                      | 0,974     | 0        |
| chr13 | 75869010  | 75869010  | C    | G   | TBC1D4   | Fam6   | Nonsynonymous | 27,4  | 5,55  | 0,02 | D                      | 0,988     | 0        |
| chr6  | 33400477  | 33400477  | C    | T   | SYNGAP1  | Fam4   | Stopgain      | 25,9  | 4,06  | 1    | A                      | 0         | 0        |
| chr2  | 166166923 | 166166923 | C    | T   | SCN2A    | Fam10  | Nonsynonymous | 23,3  | 5,27  | 0    | D                      | 0,999     | 0        |
| chr17 | 42931953  | 42931953  | T    | G   | EFTUD2   | Fam7   | Nonsynonymous | 21,8  | 5,14  | 0,32 | D                      | 0,457     | 0        |
| chr20 | 62044879  | 62044879  | C    | A   | KCNQ2    | Fam3   | Nonsynonymous | 20,7  | 4,99  | 0    | D                      | 1         | 0        |
| chr19 | 18990105  | 18990105  | A    | T   | CERS1    | Fam14  | Nonsynonymous | 20,4  | 3,71  | 1    | D                      | 0,94      | 0        |
| chr12 | 5021751   | 5021751   | C    | T   | KCNA1    | Fam12  | Nonsynonymous | 20,2  | 4,9   | 0    | D                      | 1         | 0        |
| chrX  | 70349234  | 70349234  | G    | A   | MED12    | Fam16  | Nonsynonymous | 19,76 | 5,18  | 0,11 | D                      | 0,921     | 0        |
| chr10 | 298399    | 298399    | C    | T   | ZMYND11  | Fam7   | Nonsynonymous | 19,56 | 4,32  | 0    | D                      | 0,999     | 0        |
| chrX  | 109937496 | 109937496 | G    | A   | CHRD1    | Fam15  | Nonsynonymous | 19,11 | 5,15  | 0    | D                      | 0,992     | 0        |
| chr2  | 197090524 | 197090524 | G    | A   | HECW2    | Fam21  | Nonsynonymous | 18,9  | 3,32  | 0,01 | D                      | 0,99      | 0        |
| chr3  | 148459465 | 148459465 | T    | C   | AGTR1    | Fam18  | Nonsynonymous | 17,58 | -10,4 | 0    | D                      | 1         | 0        |
| chr4  | 2181074   | 2181074   | T    | G   | POLN     | Fam23  | Nonsynonymous | 15,26 | -1,69 | 0,15 | N                      | 0,383     | 0        |
| chr9  | 140053150 | 140053150 | A    | C   | GRIN1    | Fam9   | Nonsynonymous | 12,87 | 0,298 | 0,3  | D                      | 0,133     | 0        |
| chr14 | 35231162  | 35231162  | A    | C   | BAZ1A    | Fam19  | Nonsynonymous | 12,35 | 1,16  | 0,85 | D                      | 0,006     | 0        |
| chr12 | 56717668  | 56717668  | G    | T   | PAN2     | Fam22  | Nonsynonymous | 11,86 | 5,42  | 0,82 | D                      | 0,055     | 0        |
| chr11 | 8752629   | 8752629   | G    | C   | ST5      | Fam11  | Nonsynonymous | 10,6  | 2,88  | 0,09 | N                      | 0,013     | 0        |
| chr6  | 138576840 | 138576840 | C    | T   | KIAA1244 | Fam6   | Synonymous    | 9,97  | 2,41  | 0    | 0                      | 0         | 0        |
| chr3  | 133653644 | 133653644 | C    | T   | SLCO2A1  | Fam13  | Synonymous    | 9,162 | 5,48  | 0    | 0                      | 0         | 0        |
| chr1  | 207196417 | 207196417 | T    | C   | C1orf116 | Fam20  | Nonsynonymous | 8,709 | 0,303 | 0,78 | N                      | 0,037     | 0        |
| chr1  | 11562018  | 11562018  | G    | A   | PTCH2    | Fam3   | Synonymous    | 8,536 | -2,8  | 0    | 0                      | 0         | 0        |
| chr15 | 52074974  | 52074974  | C    | T   | TMOD2    | Fam5   | Synonymous    | 8,227 | -11,3 | 0    | 0                      | 0         | 0        |
| chr22 | 43089346  | 43089346  | C    | G   | A4GALT   | Fam17  | Synonymous    | 7,733 | -2,26 | 0    | 0                      | 0         | 0        |

**MutationTaster predictions: A=Disease causing automatic, D=Disease causing, N=Polymorphism, 0=No prediction.**

| 1000 Genomes | BP substitution | AA substitution | Mutation previously reported |
|--------------|-----------------|-----------------|------------------------------|
| 0            | G2158T          | E720X           | PMID:23020937                |
| 0            | C2611T          | Q871X           | None                         |
| 0            | C400T           | R134X           | PMID:21318334                |
| 0            | G968A           | R323Q           | PMID:23708187                |
| 0            | G895A           | G299S           | None                         |
| 0            | G769A           | E257K           | None                         |
| 0            | G3296C          | G1099A          | None                         |
| 0            | C403T           | R135X           | None                         |
| 0            | C788T           | A263V           | PMID:20956790                |
| 0            | A2230C          | I744L           | None                         |
| 0            | G1687T          | D563Y           | PMID:23621294                |
| 0            | T845A           | F282Y           | None                         |
| 0            | C1207T          | P403S           | None                         |
| 0            | G3646A          | V1216M          | None                         |
| 0            | C1705T          | R569W           | PMID:25356970                |
| 0            | C670T           | R224C           | None                         |
| 0            | C3988T          | R1330W          | None                         |
| 0            | T643C           | Y215H           | None                         |
| 0            | A1140C          | K380N           | None                         |
| 0            | A1191C          | R397S           | None                         |
| 0            | T4044G          | F1348L          | None                         |
| 0            | C2107A          | Q703K           | None                         |
| 0            | C208G           | R70G            | None                         |
| 0            | C1038T          | L346L           | None                         |
| 0            | G1845A          | A615A           | None                         |
| 0            | A692G           | H231R           | None                         |
| 0            | G969A           | K323K           | None                         |
| 0            | C681T           | H227H           | None                         |
| 0            | G612C           | L204L           | None                         |
